# Supplementary material for: Misreporting of Energy Intake Is Related to Specific Food Items in Low-Middle Income Chilean Adolescents
Source: MDPI journal article supplement (doi:10.3390/children9020293), 2022-02-21
Supplement: s1 [file s1]

**Supplemental Table S1:** Description of the foods that composed each of the 29 food groups included in the factor analysis. GOCS Study, Chile 2014-2015.

| <b>Food groups</b>           | <b>Food composition</b>                                                                                                                                                                                                                                                                                       |
|------------------------------|---------------------------------------------------------------------------------------------------------------------------------------------------------------------------------------------------------------------------------------------------------------------------------------------------------------|
| White Milk                   | Fluid whole milk (3% fat), whole milk powder, reduced fat milk (2% fat), skim milk, skim milk powder                                                                                                                                                                                                          |
| Flavored milk                | Mixtures and milk drinks, strawberry, chocolate and other flavors, purchased ready-to-drink                                                                                                                                                                                                                   |
| Yogurts                      | Yogurt, fermented milk                                                                                                                                                                                                                                                                                        |
| Cheeses                      | Gouda cheese, ricotta cheese, cream cheese, cheddar cheese,                                                                                                                                                                                                                                                   |
| Meat                         | Steak beef, ground beef, beef ribs, pork chop, pork ribs, pork loin, poultry, chicken, turkey, fish, viscera (all cooking methods)                                                                                                                                                                            |
| Processed meats              | Sausage, sausages, frankfurters, meatballs ready for consumption, nuggets, hamburger ready for consumption (only meat), ham, bologna, turkey breast, chicken breast, salami                                                                                                                                   |
| Junk food                    | Pizzas, sandwiches of meat or hamburger ready to eat, wonton, egg roll, chilean hot dog, <i>sopaipillas</i> , <i>tacos</i> , <i>empanadas</i> . Mainly, street food or fast food                                                                                                                              |
| Flavored juice               | Juice or flavored drink, purchased ready-to-drink, juice or flavored drink, dry mix - unprepared                                                                                                                                                                                                              |
| Soft drinks                  | Soda pop or soft drink regular or diet                                                                                                                                                                                                                                                                        |
| Bread                        | French bread, bun bread, white bread with salt                                                                                                                                                                                                                                                                |
| Rice, and pasta              | Rice, pasta and dishes pasta.                                                                                                                                                                                                                                                                                 |
| Potatoes                     | cooked potatoes, mashed potatoes, , french fries                                                                                                                                                                                                                                                              |
| Vegetables                   | Lettuce, cabbage, raw salad, others load vegetables. Pumpkin, carrot, cucumber, tomato, among others.                                                                                                                                                                                                         |
| Fruits                       | Pineapple, banana, orange, apple, pear, papaya, mango, watermelon, tangerine, grape, blueberry, strawberry, blackberry, fruit salad, fruit juices                                                                                                                                                             |
| Eggs                         | Fried eggs, scrambled eggs, omelet, boiled eggs, egg white, egg yolk                                                                                                                                                                                                                                          |
| Homemade dishes              | Typical chilean food or meals prepared at home, restaurants or schools; that require a longer preparation time and made with natural foods. For instance: vegetables stews with or without meat, <i>cazuela</i> , <i>charquican</i> , <i>chapsui</i> , <i>humitas</i> , <i>pastel de choclo</i> among others. |
| Pulses                       | Beans, lentils, chickpeas, white beans, legumes-based preparations,                                                                                                                                                                                                                                           |
| Salty snacks                 | Crackers, saltine or soda, salty chips – snack type, cheese balls, puffs or twists, potato chips                                                                                                                                                                                                              |
| Chocolates and confectionary | Chocolate candy, chocolate candy bar, sweets based on milk, lollipop, candy, caramel, jams, <i>dulce de leche</i>                                                                                                                                                                                             |
| Sugar                        | White sugar, honey, brown sugar, syrup, chocolate powder                                                                                                                                                                                                                                                      |
| Ready to eat cereal          | Breakfast cereal, oatmeal, whole cereal, granola, corn flakes                                                                                                                                                                                                                                                 |
| Ice cream & popsicles        | Ice cream, popsicles, sherbet, dessert frozen                                                                                                                                                                                                                                                                 |
| Margarine & butter           | Salted butter, unsalted butter, salted margarine, unsalted margarine, light margarine                                                                                                                                                                                                                         |
| Desserts                     | Flan, pudding, Jell-O – gelatin, mousse, canned fruit, chilean desserts                                                                                                                                                                                                                                       |
| Dipping sauces               | Mayonnaise, ketchup, mustard                                                                                                                                                                                                                                                                                  |
| Oil                          | Vegetable oil, maravila oil, canola oil                                                                                                                                                                                                                                                                       |
| Savory Sauces                | Bolognese sauce, bachelme sauce                                                                                                                                                                                                                                                                               |
| Cookies & cakes              | Cookies and bars, granola bars, sweet biscuit and cookie stuffed, cookie sandwich, cookies commercial packaged, Cakes, cheesecake, cake sponge, doughnut, muffins, pies fruit, cupcake, cake purchased ready-to-eat                                                                                           |

**Supplemental Table S2: Reference and cut-off values used to identify misreporting among adolescents**

|              | <b>n</b> | <b>CVrEI (%)*</b> | <b>CVpER† (%)</b> | <b>CVmTEE‡ (%)</b> | <b>Plausibility range (% rEI/pER)</b> |
|--------------|----------|-------------------|-------------------|--------------------|---------------------------------------|
| <b>Girls</b> | 276      | 26.3              | 5.8               | 8.2                | 79.0 to 120.9                         |
| <b>Boys</b>  | 300      | 25.6              | 5.1               | 8.2                | 79.8 to 120.2                         |

CV, coefficient of variation; EI, energy intake; ER, energy requirement; TEE, total energy expenditure.

\* Intra-individual variation of EI (24-h recall, GOCS).

†Error in predicted energy expenditure requirements, according to Huang et al and DRI (19, 24).

‡Day-to-day variation and measurement error for TEE based on the double labelled water technique (23).

**Supplemental Table S3: Food Items**

| Food Items                  | mean %EI | SD   |
|-----------------------------|----------|------|
| Bread                       | 17.76    | 9.24 |
| Rice & Pasta                | 9.07     | 7.90 |
| Cookies & Cakes *           | 7.80     | 8.25 |
| Junk food                   | 5.99     | 9.51 |
| Meats                       | 5.35     | 6.01 |
| Soft Drinks                 | 4.52     | 4.60 |
| Home dishes                 | 3.65     | 6.61 |
| Potatoes                    | 3.63     | 5.44 |
| Processed meats             | 3.61     | 4.88 |
| Flavored juice              | 3.26     | 3.81 |
| Flavored milk               | 2.96     | 4.61 |
| White milk                  | 2.95     | 4.34 |
| Snacks salt                 | 2.78     | 5.33 |
| Yogurt                      | 2.66     | 3.59 |
| Chocolate & confectionery * | 2.58     | 4.17 |
| Fruit                       | 2.46     | 3.19 |
| Chesses                     | 2.18     | 3.19 |
| Pulses                      | 2.13     | 5.00 |
| Vegetables *                | 2.05     | 2.52 |
| Sugar                       | 2.00     | 2.32 |
| Eggs *                      | 1.90     | 2.89 |
| Ready to eat cereal         | 1.71     | 3.13 |
| Ice cream & popcicles       | 1.18     | 2.46 |
| Margarine                   | 1.17     | 1.77 |
| Desserts                    | 1.14     | 2.99 |
| Dipping sauces              | 0.92     | 2.05 |
| Oil                         | 0.80     | 0.92 |
| Savory sauces               | 0.79     | 1.85 |
